1 The ClpX chaperone controls the *Staphylococcus aureus*  
2 cell cycle but can be bypassed by  $\beta$ -lactam antibiotics

3  
4 Kristoffer T. Bæk<sup>1</sup>▫, Camilla Jensen<sup>1</sup>▫; Clement Gallay<sup>2</sup>, Niclas Strange Fisker<sup>1</sup>; Ida  
5 Thalsø-Madsen<sup>1</sup>, Ana R. Pereira<sup>3</sup>, Wilhelm Paulander<sup>1</sup>, Jan-Willem Veening<sup>2</sup>, Mariana  
6 G. Pinho<sup>3</sup>; and Dorte Frees<sup>1\*</sup>

7 <sup>1</sup>Department of Veterinary Disease Biology, University of Copenhagen, 1870  
8 Frederiksberg C, Denmark; <sup>2</sup>Universite de Lausanne, Department of Fundamental  
9 Microbiology; <sup>3</sup>Bacterial Cell Biology, Instituto de Tecnologia Química e Biológica  
10 António Xavier, Universidade Nova de Lisboa, Oeiras, Portugal.

11  
12 ▫ These two authors contributed equally to the presented work

13 \* Corresponding author. Mailing address: Department of Veterinary Disease Biology,  
14 University of Copenhagen, Stigbøjlen 4, DK-1870 Frederiksberg C, Denmark. E-mail:  
15 df@sund.ku.dk; Tel: (+45) 3533 2719.

16  
17  
18 **Short title: ClpX coordinates cell division in *Staphylococcus aureus***

19

20

21 **Abstract**

22 The worldwide spread of *Staphylococcus aureus* strains resistant to almost all  $\beta$ -lactam  
23 antibiotics is of major clinical concern.  $\beta$ -lactams interfere with cross-linking of the  
24 bacterial cell wall, but the killing mechanism of this important class of antibiotics is not  
25 fully understood. Here we show that sub-lethal doses of  $\beta$ -lactams stimulate the growth  
26 of *S. aureus* mutants lacking the widely conserved chaperone ClpX. *S. aureus clpX*  
27 mutants have a severe growth defect at temperatures below 37°C, and we reasoned  
28 that a better understanding of this growth defect could provide novel insights into how  $\beta$ -  
29 lactam antibiotics interfere with growth of *S. aureus*. We demonstrate that ClpX is  
30 important for coordinating the *S. aureus* cell cycle, and that *S. aureus* cells devoid of  
31 ClpX fail to divide, or lyse spontaneously, at high frequency unless  $\beta$ -lactams are added  
32 to the growth medium. Super-resolution imaging revealed that *clpX* cells display  
33 aberrant septum synthesis, and initiate daughter cell separation prior to septum  
34 completion at 30°C, but not at 37°C. FtsZ localization and dynamics were not affected in  
35 the absence of ClpX, suggesting that ClpX affects septum formation and autolytic  
36 activation downstream of Z-ring formation. Interestingly,  $\beta$ -lactams restored septum  
37 synthesis and prevented premature autolytic splitting of *clpX* cells. Strikingly, inhibitors  
38 of wall teichoic acid (WTA) biosynthesis that work synergistically with  $\beta$ -lactams to kill  
39 MRSA synthesis also rescued growth of the *clpX* mutant, underscoring a functional link  
40 between the PBP activity and WTA biosynthesis. The finding that  $\beta$ -lactams can  
41 prevent lysis and restore septum synthesis of a mutant with dysregulated cell division  
42 lends support to the idea that PBPs function as coordinators of cell division and that  $\beta$ -  
43 lactams do not kill *S. aureus* simply by weakening the cell wall.

44 **Author Summary**

45 The bacterium *Staphylococcus aureus* is a major cause of human disease, and the  
46 rapid spread of *S. aureus* strains that are resistant to almost all  $\beta$ -lactam antibiotics has  
47 made treatment increasingly difficult.  $\beta$ -lactams interfere with cross-linking of the  
48 bacterial cell wall but the killing mechanism of this important class of antibiotics is still  
49 not fully understood. Here we provide novel insight into this topic by examining a  
50 defined *S. aureus* mutant that has the unusual property of growing markedly better in  
51 the presence of  $\beta$ -lactams. Without  $\beta$ -lactams this mutant dies spontaneously at a high  
52 frequency due to premature separation of daughter cells during cell division. Cell death  
53 of the mutant can, however, be prevented either by exposure to  $\beta$ -lactam antibiotics or  
54 by inhibiting synthesis of wall teichoic acid, a major component of the cell wall in Gram-  
55 positive bacteria with a conserved role in activation of autolytic splitting of daughter  
56 cells. The finding that the detrimental effect of  $\beta$ -lactam antibiotics can be reversed by a  
57 mutation that affect the coordination of cell division emphasizes the idea that  $\beta$ -lactams  
58 do not kill *S. aureus* simply by weakening the cell wall but rather by interference with the  
59 coordination of cell division.

60

61

## 62 **Introduction**

63 *Staphylococcus aureus* is a commensal bacterium capable of causing a variety of both  
64 localized and invasive infections. Due to its ability to acquire resistance to all relevant  
65 antibiotics *S. aureus* remains a major clinical challenge worldwide [1]. The most  
66 challenging antimicrobial resistance issue in *S. aureus* has been the dissemination of  
67 methicillin-resistant *S. aureus* (MRSA) strains that are resistant to almost all  $\beta$ -lactam  
68 antibiotics, one of the safest and most widely used classes of antibiotics ever developed  
69 [2]. Early work on the mechanism of action of  $\beta$ -lactams culminated in the discovery that  
70 penicillin inhibits crosslinking of peptidoglycan (PG), the central component of bacterial  
71 cell walls [3]. The enzymes mediating cross-linking of peptidoglycan strands, the targets  
72 of penicillin, were therefore designated penicillin binding proteins (PBPs). The  
73 realization that penicillin inhibits PG crosslinking led to the classical model in which  
74 penicillin-mediated cell lysis is believed to occur as a consequence of a mechanically  
75 weakened cell wall incapable of withstanding high intracellular turgor [3,4]. The killing  
76 effect of  $\beta$ -lactam antibiotics, however, has turned out to be more complex [5-9], and  
77 may even vary between bacteria, as the organization of PG synthesis and the number  
78 of PBPs differ widely between bacterial species [10]. Spherical bacteria such as *S.*  
79 *aureus* have only one cell wall synthesis machine, and *S. aureus* encodes only four  
80 PBPs [11]. Notably, MRSA and other Staphylococci have obtained resistance to  $\beta$ -  
81 lactams by horizontal acquisition of the *mecA* gene encoding an alternative PBP  
82 (PBP2a) that is resistant to inhibition by most  $\beta$ -lactams [12,13]. PBP2a mediated  
83 resistance additionally depends on several intrinsic factors that can be targeted by  
84 specific compounds to re-sensitize MRSA to  $\beta$ -lactams [14-16]. As an example,

85 inhibitors of wall teichoic acid (WTA) biosynthesis, work synergistically with  $\beta$ -lactams to  
86 kill MRSA both *in vitro* and in *in vivo* models of infection, thereby opening a novel  
87 paradigm for combination treatment of MRSA [16]. Indeed, a combination strategy  
88 pairing  $\beta$ -lactamase inhibitors with  $\beta$ -lactams has proven highly successful in restoring  
89  $\beta$ -lactam efficacy against Gram-negative bacteria [17].

90 The ClpX chaperone is conserved among bacteria and organelles of eukaryotic cells  
91 [18]. The ClpX chaperone has a dual role in cells targeting proteins for degradation by  
92 the ClpP protease and, independently of ClpP, facilitating protein folding and  
93 interactions [18]. *S. aureus clpX* mutant exhibits a mild growth defect at 37°C that is  
94 severely exacerbated at 30°C [19,20]. This cold-sensitive growth defect of the *clpX*  
95 mutant is independent of ClpP, and is alleviated by loss-of-function mutations in the *ltaS*  
96 gene [20,21]. *ltaS* encodes the LtaS synthetase that is required for synthesis of  
97 lipoteichoic acid (LTA), an essential cell wall polymer of Gram-positive bacteria  
98 controlling cell division and autolytic activity [22]. Interestingly, inactivation of ClpX  
99 restored the septum placement defects of cells depleted for LTA, suggesting a link  
100 between ClpX and cell division in *S. aureus* [20].

101 Indeed, the data presented here demonstrate that ClpX becomes critical for progression  
102 of *S. aureus* septum synthesis as the temperature decreases. In cells with delayed  
103 septum synthesis, autolytic splitting of daughter cells is activated prior to septum  
104 completion resulting in cell lysis, unless  $\beta$ -lactam antibiotics are added to the growth  
105 medium. Strikingly, inhibitors of WTA biosynthesis, similarly to mutations in *ltaS*  
106 specifically rescue growth of *S. aureus clpX* mutants, emphasizing a fundamental  
107 connection between the transpeptidase activity of PBPs and teichoic acids biosynthesis.

108 In conclusion, this study identifies the ClpX chaperone as an important player in *S.*  
109 *aureus* cell division at sub-optimal temperatures, and provides novel insight into the link  
110 between  $\beta$ -lactam antibiotics and cell division in this important pathogen.

111

112

113

114

115

116

## 117 **Results**

### 118 **$\beta$ -lactam antibiotics stimulate growth of *S. aureus clpX* mutants**

119 Serendipitously, in determining the susceptibility of the *S. aureus clpX* mutant to  
120 oxacillin, we repeatedly observed zones of improved growth at a certain distance from  
121 the filter discs containing the antibiotic, a phenomenon that was not observed for wild-  
122 type strains (marked by arrow in Fig 1a). This observation indicated that sub-lethal  
123 concentrations of oxacillin stimulate growth of the *clpX* mutant. Indeed, addition of sub-  
124 lethal concentrations of oxacillin rescued the severe growth defect normally seen for *S.*  
125 *aureus clpX* mutants at 30°C (Fig 1b). To investigate if growth of *S. aureus clpX*  
126 mutants is generally improved by addition of  $\beta$ -lactam antibiotics, three *S. aureus* strains  
127 of clinical origin, representing both MRSA (JE2) and methicillin-sensitive *S. aureus*  
128 (SA564 and Newman), and the corresponding *clpX* deletion strains were grown in broth  
129 containing oxacillin, meropenem or cefuroxime (representing three different chemical  
130 classes of  $\beta$ -lactams) in various concentrations below and above the previously  
131 determined MIC values [23]. We found that the presence of  $\beta$ -lactam antibiotics  
132 increased the growth rate and the final yield of the *clpX* mutants in all strain  
133 backgrounds (Fig 1c and 1d; S1 Fig). As shown previously [23], inactivation of *clpX*  
134 increased the MIC values in the JE2 background (S1 Fig), but not in the MSSA strain  
135 backgrounds. A wide range of  $\beta$ -lactam concentrations was tested, but we did not  
136 identify any concentration at which the growth rates of the wild-type strains were  
137 enhanced (S1 Fig). For comparison, we also included *clpP* mutants, but observed no or  
138 only a minor stimulatory effect on the growth rate of the *clpP* mutants in the presence of

139  $\beta$ -lactams (S1 Fig). We conclude that the ClpX dependent growth defect that is  
140 suppressed by  $\beta$ -lactams is caused by loss of ClpX chaperone activity, not loss of  
141 ClpXP protease activity.

142

### 143 **Oxacillin prevents premature growth arrest and spontaneous lysis of *clpX* cells**

144 Given the unusual ability of  $\beta$ -lactams to stimulate growth of the *clpX* mutant, we  
145 reasoned that a better understanding of the *clpX* growth defect could provide novel  
146 insights into how  $\beta$ -lactam antibiotics interfere with growth of *S. aureus*. To investigate  
147 how  $\beta$ -lactams improve growth of the *clpX* mutant, we studied the growth of single cells  
148 of the *S. aureus* SA564 wild type and *clpX* mutant in the absence or presence of  
149 oxacillin at 30°C using automated phase contrast time-lapse microscopy. Interestingly,  
150 the time-lapse experiments demonstrated that only few *clpX* cells started to divide and  
151 that many *clpX* cells lysed spontaneously or stopped dividing early on in the experiment  
152 (Fig 2a and S1 Movie); accordingly only about one third of the *clpX* mutant cells ended  
153 up forming a micro-colony. While addition of sub-lethal concentrations of oxacillin did  
154 not affect growth of the wild type, growth of the *clpX* mutant was clearly stimulated at  
155 the single-cell level (Fig 2b). In the presence of oxacillin, only very few *clpX* cells lysed  
156 or stopped dividing during the experiment, and the *clpX* mutant reached a higher  
157 number of cells than the wild type by the end of the experiment (Fig 2b and 2c). To  
158 quantify the cell generation time (time between two divisions), we tracked the fate of  
159 each individual cell in one representative micro-colony of each strain during the first 8 h  
160 of the experiment (S2 Fig). For the wild type, the average cell generation time was  $66 \pm$



161 42 min without oxacillin, and  $78 \pm 58$  min with oxacillin, with only few divisions observed  
162 after 4 h in both cases (Fig 2c, S2 Fig, and S1 Table). For the *clpX* mutant, the average  
163 cell generation time was  $71 \pm 36$  (note, only 11 divisions) min in the absence of  
164 oxacillin. Interestingly, in the presence of oxacillin the generation time for *clpX* mutant  
165 cells decreased throughout the experiment to an average of  $38 \pm 23$  min during the last  
166 2 h (Fig 2c, S2 Fig, and S1 Table). Hence, oxacillin seems to stimulate growth of the  
167 *clpX* mutant by both shortening the generation time and preventing premature growth  
168 arrest, and lysis of the mutant.

169

### 170 **Aberrant septum synthesis and premature splitting of *clpX* daughter cells**

171 To further investigate the *clpX* phenotypes, we studied the morphology of wild-type and  
172 *clpX* mutant cells by transmission electron microscopy (TEM) and scanning electron  
173 microscopy (SEM) after growth at 30°C. As reported before, cells lacking ClpX are  
174 significantly smaller than wild-type cells and have a thickened cell wall (Fig 3a) [23].  
175 Consistent with the spontaneous cell lysis observed in the time-lapse microscopy  
176 approximately 10% of the *clpX* mutant cells grown at 30°C appeared as lysed ghost  
177 cells in the TEM images (S3 Fig). Interestingly, these ghost cells had a characteristic  
178 appearance in which the cell wall was ripped apart at the tips of ingrowing, still  
179 incomplete, septa (see examples in Fig 3c), indicating that these cells underwent lysis  
180 while in the process of daughter-cell splitting. To divide, *S. aureus* builds a septal cross  
181 wall generating two hemispherical daughter cells connected through a narrow peripheral  
182 ring [24,25]. Resolution of this peripheral wall ring leads to rapid splitting of daughter

183 cells, in a process designated as “popping” [25]. Popping normally occurs only in cells  
184 with closed septa and consistent with this notion, daughter cell splitting was not  
185 observed in wild-type cells with incomplete septa (S3 Fig). In contrast, a fraction  
186 (quantified below) of the *clpX* mutant cells seemed to have initiated splitting of daughter  
187 cells despite having incomplete septa (see examples Fig 3d and 3e, and S3 Fig). In  
188 TEM images, initiation of splitting appeared as small invaginations at the external edge  
189 of the septum in cells with incomplete septa, but occasionally, a complete splitting of the  
190 ingrowing septum and elongation of cells were observed (Fig 3d and 3e, middle panels).  
191 In SEM images, the stage of septum ingrowth could not be monitored. Strikingly,  
192 however, it was possible to visualize *clpX* cells in the process of splitting despite  
193 displaying a non-closed septal cross-wall (seen as a hole; Fig 3c right panel), or *clpX*  
194 mutant cells in the process of splitting while still being connected by an undivided  
195 cytoplasm (Fig 3d right panel). Taken together, these findings strongly suggest that in  
196 the absence of ClpX, the system controlling the onset of autolytic separation of daughter  
197 cells becomes dysregulated, and that premature splitting of *clpX* cells with incomplete  
198 septa result in cell lysis.

199 Some *clpX* cells also displayed septa extending asymmetrically towards the cell center,  
200 and in extreme cases extending inwards only from one side (+/- premature split; Fig 3d  
201 and 3e). This contrasts with wild-type *S. aureus* cells whose septa always extended  
202 symmetrically inwards from the edge of the cell wall (Fig 3a and S Fig 3). Finally, in  
203 some *clpX* cells, unordered membranous material reminiscent of mesosome-like  
204 structures [26] were observed at the site of septum ingrowth (Fig 3e and 3f). The latter

205 phenotypes suggest that ClpX contributes to coordinating septum formation in *S.*

206 *aureus*.

207

## 208 **The ClpX chaperone becomes critical for septum completion at 30°C**

209 To quantify these phenotypes and to observe overall differences in progression of the  
210 cell cycle between wild-type and *clpX* cells, we performed Super-Resolution Structured  
211 Illumination Microscopy (SR-SIM) on cells stained with the membrane dye Nile red, and  
212 scored cells according to the stage of septum ingrowth as described by Monteiro et al.  
213 [24]; see Fig 4a for example images. To enumerate cells with incomplete septa that  
214 show signs of premature splitting, cells were additionally stained with fluorescently  
215 modified vancomycin (Van-FL), which labels the entire cell wall (cell periphery and  
216 septum), or with a green fluorescent derivative of wheat germ agglutinin WGA-488 that  
217 only labels the peripheral wall [24,27]. To estimate the number of lysed cells, DNA was  
218 stained with the blue dye Hoechst 3334. In this analysis, no significant differences in the  
219 distribution of cells in the different phases were observed for wild-type and *clpX* cells  
220 grown at 37°C (Fig 4a). At 30°C, however, significantly fewer *clpX* cells displayed a  
221 complete septum (4% as opposed to 15% of wild-type cells;  $P < 0.001$ ). Moreover, while  
222 the fraction of cells that were in the process of building a septum (phase 2) was similar  
223 in wild-type and *clpX* cells at both temperatures, a more detailed analysis of the phase 2  
224 cells revealed striking differences (Fig 4): consistent with the TEM analysis, a  
225 substantial number of *clpX* cells with incomplete septa showed signs of premature  
226 daughter cell splitting (20% of phase 2 cells), or had asymmetrical septum ingrowth (7%  
227 of phase 2 cells) when cells were grown at 30°C. None of these phenotypes were

228 observed in wild-type cells at any temperature. While asymmetrical septum ingrowth  
229 was not observed in *clpX* cells grown at 37°C, premature splitting cells could be  
230 observed, however, at a lower frequency (Fig 4b). Furthermore, when subdividing  
231 phase 2 cells into two subclasses based on the extent of septum ingrowth, the  
232 proportion of *clpX* cells displaying early septum ingrowth (defined as cells with less than  
233 15% septum ingrowth; see examples in Fig 4b) was significantly ( $P < 0.001$ ) higher after  
234 growth at 30°C compared to 37°C, and when compared to the wild-type. For wild-type  
235 cells, an equal fraction of cells displayed early septum ingrowth at 30°C and 37°C.  
236 Finally, SR-SIM confirmed that the fraction of lysed *clpX* cells increased significantly  
237 when the temperature was decreased (2% at 37°C, and 16% at 30°C,  $P < 0.001$ ). In  
238 comparison, the proportion of lysed wild-type cells was estimated to be below 2% at  
239 both temperatures.

240 In conclusion, the proportion of *clpX* mutant cells displaying a complete septum or late  
241 septum ingrowth was significantly reduced at 30°C, while the proportion of *clpX* cells  
242 displaying early septum ingrowth and aberrant septum was significantly increased at  
243 30°C. Thus, the microscopy analyses suggest that ClpX chaperone activity becomes  
244 critical for the ability of *S. aureus* to complete the division septum as the temperature  
245 decreases.

246

### 247 **Oxacillin restores the cell cycle of *clpX* cells**

248 To further examine how  $\beta$ -lactams improve growth of the *clpX* mutant, we performed  
249 SR-SIM analysis on oxacillin treated wild-type and *clpX* mutant cells grown at 30°C, as

250 described above (Fig 4). Interestingly, sub-lethal concentrations of oxacillin significantly  
251 increased the fraction of phase 3 cells (closed septum): from 15 to 31% in the wild-type  
252 ( $P < 0.001$ ), and from 4 to 14% in the *clpX* mutant ( $P < 0.001$ ). Moreover, oxacillin  
253 significantly decreased the fraction of *clpX* cells (phase 2) that had initiated cell  
254 separation prior to septum completion from 20% to 2%, and in line with this observation,  
255 almost no lysed *clpX* mutant cells were observed (Fig 4b). Hence, oxacillin increases  
256 the fraction of cells with complete division septa in both the wild-type and the *clpX*  
257 backgrounds, and prevents premature splitting of *clpX* cells with incomplete division  
258 septa. In contrast, asymmetrical ingrowth of septa is still readily observed in oxacillin  
259 treated *clpX* mutant cells (Fig 4a and b).

260 These conclusions were supported when the oxacillin treated SA564 wild-type and *clpX*  
261 cells were analyzed by TEM (S4 Fig). TEM also showed that oxacillin prevented  
262 formation of mesosome-like structures in *clpX* cells (S4 Fig). However oxacillin  
263 treatment conferred a number of well described morphological changes that were  
264 shared by wild-type and *clpX* cells including thickening and misplacement of septa, a  
265 more fuzzy surface, and blurring of the electron-dense septal mid-zone (S4 Fig)  
266 [7,27,28]. Finally, many cells were present in pairs that have remained partly attached at  
267 the midline following septum completion (S4 Fig). Hence, both the SR-SIM and the TEM  
268 images support that oxacillin, even in concentrations well below the MIC value, prolongs  
269 phase 3 and delays splitting of the septum.

270

271 **Oxacillin antagonizes the septum progression defects conferred by inactivation**  
272 **of ClpX.**

273 To directly assess the impact of ClpX and oxacillin on progression of septal PG  
274 synthesis, we used an established metabolic labeling method with fluorescent D-amino  
275 acids (FDAAs) to visualize regions of new PG insertion [24,29,30]. PG synthesis was  
276 followed at 30°C and 37°C by sequentially labeling cells with FDAAs of different colors,  
277 thereby creating a virtual time-lapse image of PG synthesis [24,29,30]. Cells were first  
278 pulse-labeled for 10 min with green nitrobenzofurazan-amino-D-alanine (NADA),  
279 followed by a 10-min pulse with the blue hydroxycoumarin-amino-D-alanine (HADA).  
280 Labeled cells were imaged by SR-SIM, and progression of PG synthesis was scored in  
281 300 randomly picked wild-type and *clpX* mutant cells grown in the absence or presence  
282 of oxacillin (Fig 5., note that NADA is displayed in red). In the absence of oxacillin, PG  
283 synthesis proceeded from phase 1 (no septa, PG synthesis takes place in the lateral  
284 wall) to phase 2 (septal PG synthesis progresses inwards), and finally phase 3 (closed  
285 septum, PG synthesis occurs in both septum and the lateral wall) in > 95% of wild-type  
286 cells, as described in [24,25] (see Fig 5a). When the *clpX* mutant was grown at 37°C,  
287 PG synthesis followed the wild-type paradigm (S5 Fig). In contrast, when the *clpX*  
288 mutant was grown at 30°C, the septal PG synthesis progressed abnormally in a  
289 substantial fraction of phase 2 cells, as  $22 \pm 3$  % of the *clpX* cells that had initiated  
290 septum formation in the first period of labeling (NADA) did not continue septum  
291 synthesis in the second period of labeling (HADA). Instead, the HADA signal co-  
292 localized with the NADA signal in the early septum ingrowth, and additionally, a  
293 peripheral HADA signal was visible (see examples in Fig 5a indicated by grey  
294 asterisks). Because other *clpX* cells displaying NADA labeling in an early septal  
295 ingrowth were indeed capable of septum progression and septum closure (green

296 asterisks in Fig 5a), the septal PG synthesis rate does not seem to be generally  
297 reduced in the *clpX* mutant. Instead, the co-localization of the NADA and HADA in an  
298 early septum ingrowth may reflect stalling of septum synthesis in a subpopulation of  
299 *clpX* cells. Interestingly, in the presence of a sub-lethal concentration of oxacillin the  
300 fraction of *clpX* cells displaying co-localization of NADA and HADA at the early-septum  
301 ingrowth was reduced to  $6 \pm 2$  % (Fig 5b).

302 FDAs only incorporate into newly synthesized PG and therefore premature splitting  
303 initiating from the peripheral wall cannot be detected with this approach [30]. However,  
304 splitting of newly synthesized, still incomplete, septum was observed (pink asterisks in  
305 Fig 5a), and while this phenotype was not observed in wild-type cells, this phenotype  
306 was displayed in about  $20 \pm 2$  % of the *clpX* cells (phase 2 cells) grown in the absence  
307 of oxacillin. In the presence of oxacillin, only  $8 \pm 2$  % of *clpX* cells showed splitting of  
308 newly synthesized still incomplete septa (see example in Fig 5b). In wild-type cells  
309 grown in the presence of oxacillin, NADA- and HADA signals more often co-localized in  
310 the entire septal plane (examples depicted in Fig 5b), supporting that wild-type cells  
311 grown with oxacillin spend longer time in phase 3. We conclude that at temperatures  
312 below the optimum, the ClpX chaperone activity becomes important for *S. aureus* septal  
313 PG synthesis to proceed beyond the point of septum initiation, and that oxacillin  
314 antagonizes the septum progression defects conferred by inactivation of ClpX.

315

316 **Oxacillin promotes septal PG synthesis in *clpX* cells with premature split**

317 The results presented so far suggest that oxacillin improves growth of an *S. aureus clpX*  
318 mutant by stimulating septal PG synthesis and inhibiting premature splitting and lysis of  
319 daughter cells. To investigate septal PG synthesis in cells with premature splitting, we  
320 randomly picked 50 *clpX* cells grown at 30°C that had initiated septum formation during  
321 incubation with NADA, and that displayed the characteristic morphology of premature  
322 splitting, and assessed where HADA was incorporated in these cells. Interestingly, only  
323 very few *clpX* cells displaying premature septum split continued synthesizing septum  
324 (Fig 5c-i); instead HADA was incorporated at the cell periphery (Fig 5c-ii). In a few cells  
325 no HADA signal was detected at all (Fig 5c-iii). Similar results were obtained if the order  
326 of labeling was reversed (data not shown). Hence, septal PG synthesis seems to stop  
327 and instead become dispersed to the peripheral wall in *clpX* cells displaying splitting of  
328 a yet incomplete septum. Remarkably, in oxacillin treated cells, septum synthesis  
329 progressed normally in most cells with premature split ( $40 \pm 1$  of 50 cells,  $P < 0.001$ , Fig  
330 5c). Taken together, this analysis demonstrates that oxacillin antagonizes the arrest of  
331 septum synthesis observed in *clpX* cells with premature septal split.

332

### 333 **FtsZ localization and dynamics are not affected in the *clpX* mutant**

334 ClpX from diverse bacteria interacts directly with FtsZ suggesting that the ClpX  
335 chaperone has a conserved role in assisting assembly/disassembly of the FtsZ polymer  
336 [31-34]. We therefore reasoned that ClpX may regulate septum progression by  
337 interfering with FtsZ dynamics. To study localization and dynamics of FtsZ, a plasmid  
338 expressing eYFP-tagged derivative of FtsZ from an IPTG-inducible promoter [35] was



339 introduced into *S. aureus* wild-type and *clpX* mutant cells, and time-lapse fluorescence  
340 microscopy was performed on cells growing on a semi-solid matrix at 30°C. In both wild-  
341 type and *clpX* mutant cells, Z-ring dynamics progressed predictably throughout the cell  
342 cycle (S2 Movie and Fig 6a): in newly divided cells, the Z ring has the same diameter as  
343 the cell until the ring starts to reduce in diameter and eventually closes (as described in  
344 [36]). Following closure, FtsZ undergoes a period of highly dynamic re-distribution,  
345 before the Z-ring cycle starts over again in newly divided cells. Hence, FtsZ dynamics  
346 appear not to be affected by lack of ClpX activity. Next, we imaged the relative  
347 localization of FtsZ and PG synthesis by sequentially labeling PG synthesis with FDAAs  
348 as described above, except that tetramethylrhodamine 3-amino-d-alanine (TADA, red  
349 signal) was used instead of NADA to avoid overlap with the yellow eYFP signal. In both  
350 wild-type and *clpX* cells, the eYFP signal localized ahead of septal PG synthesis in all  
351 phase 2 cells (Fig 6b and overview in S6 Fig). Specifically, FtsZ also localized ahead of  
352 the FDAA signal in *clpX* cells having HADA and TADA signal co-localizing in an early  
353 septum in growth (Fig 6b). Strikingly, the FtsZ signal maintained its septal localization in  
354 *clpX* cells with premature split and arrest of septal PG-synthesis (see example in Fig  
355 6b). As also shown above, PG incorporation in such cells takes place in the peripheral  
356 wall. Hence, our data supports the idea that FtsZ dynamics is not impeded in cells  
357 lacking ClpX.

### 358 **Inhibitors of WTA biosynthesis rescue growth of the *clpX* mutant**

359 Finally, we asked if the ability to rescue growth of an *S. aureus clpX* mutant is specific  
360 for the  $\beta$ -lactam class of antibiotics (S7 Fig). The compounds assessed were either  
361 antibiotics with completely different targets, or compounds inhibiting various steps in the

362 cell envelope synthesis pathway. Interestingly, only tunicamycin and tarocin A1, two well  
363 characterized inhibitors of WTA biosynthesis that work synergistically with  $\beta$ -lactams to  
364 kill *S. aureus* [14,16], stimulated growth of the *clpX* mutant (Fig 7 and S7 Fig). Strikingly,  
365 tunicamycin was almost as efficient as oxacillin in stimulating growth of the *clpX* (Fig  
366 7c). In contrast, other late stage inhibitors of PG synthesis, such as vancomycin, did not  
367 stimulate growth of the *clpX* mutant, even though this antibiotic, similarly to  $\beta$ -lactams,  
368 prevents PG cross-linking (S7 Fig). Lysostaphin, which breaks already formed cross-  
369 bridges, also had no stimulatory effect on growth of the *clpX* mutant (S7 Fig). These  
370 findings indicate that reduced cross-linking *per se* does not alleviate the growth defect  
371 of the *clpX* mutant and that the growth defect of *S. aureus clpX* mutants is specifically  
372 rescued by tunicamycin, tarocin A1, and  $\beta$ -lactam antibiotics underscoring a functional  
373 link between the PBP activity and WTA biosynthesis.

374 **Discussion**

375 Assembly of the bacterial cell division machinery is a highly coordinated process with  
376 proteins recruited to the division site in a specific order and depending on the timely  
377 interaction between a large number of proteins [37]. Here, we show that the widely  
378 conserved ClpX chaperone plays an important role in staphylococcal cell division at  
379 30°C but not at 37°C. In wild-type *S. aureus* cells, splitting of daughter cells is not  
380 initiated prior to septum closure. In contrast, a substantial fraction of *clpX* cells  
381 displaying incomplete septa had initiated splitting of daughter cells indicating that the  
382 system responsible for coordinating autolytic splitting with septum completion has  
383 become dysregulated. In *clpX* cells displaying the premature splitting phenotype, septal  
384 PG synthesis was not continued, and instead became dispersed to the peripheral wall  
385 demonstrating that *clpX* cells with premature split are unable to finalize the septum. The  
386 detrimental character of this defect likely prevents cells from undergoing further  
387 divisions, explaining why a large proportion of *clpX* cells are non-dividing and end up  
388 lysing. In support hereof, TEM pictures show that most *clpX* ghost cells were in the  
389 process of splitting despite having an incomplete septum. This is likely due to turgor  
390 pressure forces breaking the tip of the ingrowing septum where the cell wall is thin and  
391 mechanically weak [38]. Hence, we assume that premature splitting is the underlying  
392 cause for the high rate of spontaneous lysis observed among *clpX* cells.

393 Importantly, cells devoid of ClpX contain elevated levels of the two major autolysins  
394 associated with separation of *S. aureus* daughter cells, Sle1 and Atl [20,21,39,40].  
395 Therefore, premature splitting of *clpX* cells could simply be a consequence of excess  
396 autolysins. However, whilst the elevated levels of Sle1 and Atl may contribute to the

397 premature splitting and spontaneous lysis of *clpX* cells, we believe that additional  
398 factors are in play. This is based on the findings that i) premature splitting and lysis of  
399 *clpX* cells is more frequent at 30°C than at 37°C, whereas autolysin levels are elevated  
400 at both temperatures [20,21,39,40]; and, ii) the *clpX* phenotypes described here are not  
401 shared by a *clpP* mutant, although *clpP* mutant cells also contain elevated Sle1 levels  
402 [20,21,23,41]. Taken together these findings indicate that the high levels of autolysins  
403 are more detrimental to *clpX* cells growing at 30°C, suggesting that ClpX in addition to  
404 controlling the levels of autolysins also affects their activation via a temperature  
405 dependent pathway. As stalling of early septum synthesis in *clpX* cells was observed  
406 only at the lower temperature, we speculate that stalling of septum synthesis contributes  
407 to premature activation of autolysins in the *clpX* mutant as depicted in the working  
408 model shown in Fig 8. In this model, *S. aureus* depends on ClpX chaperone activity for  
409 transforming an early stage divisome complex into a late stage divisome complex at  
410 30°C but not at 37°C. At both temperatures, the high levels of autolysins in the *clpX*  
411 mutant will make the mutant more prone to initiate daughter cell separation before  
412 septum completion. However, stalling of the divisome by an unknown mechanism  
413 exacerbates the risk of premature split at 30°C. In support hereof, premature split was  
414 also observed in *clpX* cells grown at 37°C, however, at this temperature septal  
415 progression seems to proceed fast enough to enable completion of the septum, as  
416 outlined in Fig 8. Notably, FtsZ localization and dynamics were not affected in the  
417 absence of ClpX, suggesting that ClpX affects septum formation and autolytic activation  
418 downstream of Z-ring formation. Intriguingly, *S. aureus* cytokinesis was recently  
419 proposed to occur in two-steps: an initial FtsZ dependent slow step that may drive the

420 initial membrane invagination, and a second faster step driven by PG synthesis and  
421 recruitment of late division proteins such as MurJ [36]. Hence, we speculate that ClpX  
422 promotes septum formation at 30°C by assisting recruitment of MurJ or other central  
423 components of the late divisome complex.

424

425 Because mis-coordination in activation of autolytic enzymes may have fatal  
426 consequences for the cell, regulatory checkpoints that coordinate the autolytic system  
427 with septum completion likely exist, however, little is known about these mechanisms.  
428 Remarkably, the growth and lysis defect of the *clpX* mutant was alleviated by sub-lethal  
429 concentrations of  $\beta$ -lactam antibiotics. This intriguing finding is to our knowledge the first  
430 example of  $\beta$ -lactam antibiotics increasing the growth-rate and preventing spontaneous  
431 lysis of a bacterial mutant. The presented data show that oxacillin simultaneously  
432 rescues septum synthesis, and prevents premature splitting, mesosome formation, and  
433 spontaneous lysis of the *clpX* mutant, lending further support to a linkage between  
434 these phenotypes. The ability of sub-lethal concentrations of  $\beta$ -lactam antibiotics to  
435 suppress spontaneous lysis of *clpX* mutant cells was surprising, as the lethal activity of  
436  $\beta$ -lactam antibiotics is believed to stem from the loss of wall integrity accompanied by  
437 cell lysis [5,9,42]. Here, we observed that oxacillin treatment of both *S. aureus* wild-type  
438 and *clpX* mutant cells increased the fraction of cells displaying a complete division  
439 septum, supporting previous findings that  $\beta$ -lactams delay autolytic splitting of daughter  
440 cells [7,28]. Moreover, the sequential PG staining experiments showed that late septal  
441 FDAA signals often overlap in wild-type cells grown in the presence of oxacillin,  
442 indicating that  $\beta$ -lactams also prolong PG synthesis in the completed septum (which

443 may be a consequence of delayed autolytic cell splitting). Consistent with these  
444 findings,  $\beta$ -lactams treated *S. aureus* cells display characteristic thickened septum in  
445 TEM images [7,28]. One possible scenario to explain how  $\beta$ -lactams rescue *clpX* cells is  
446 therefore that oxacillin prevents spontaneous lysis of the *clpX* mutants by suppressing  
447 activation of autolytic enzymes and by stimulating late septal PG synthesis (Fig 8). Vice  
448 versa, the earlier onset of autolytic activity mediated by inactivation of ClpX, may  
449 counteract the delay in autolytic splitting of daughter cells observed in oxacillin treated  
450 wild-type cells, thereby explaining the reduced cell generation time of *clpX* cells  
451 compared to wild-type cells in the presence of oxacillin.

452 In support of a central role of autolysins in the *clpX* phenotypes, we previously showed  
453 that the fast-growing suppressor mutants arising when *clpX* cells are grown at 30°C  
454 have loss-of-function mutations in the *ltaS* gene encoding the LtaS synthetase that is  
455 essential for synthesis of LTA, another key regulator of autolytic activity [20]. Similarly,  
456 WTA seems to impede splitting of the septal cross wall and control Atl localization  
457 [14,43]. Strikingly, two inhibitors of WTA synthesis, tunicamycin and tarocin A1, were  
458 the only other compounds that similarly to  $\beta$ -lactams rescued growth of the *clpX* mutant.  
459 In our working model, we therefore propose that inhibition of WTA stimulates growth of  
460 the *clpX* mutant by impeding premature split of *clpX* cells (Fig 8).

461 In conclusion, we have shown that *S. aureus* cell division is temperature sensitive, and  
462 that at 30°C, the ClpX chaperone serves an important function in coordinating initiation  
463 of daughter cell separation with septum completion. When ClpX is absent, cell division  
464 frequently has a fatal outcome because septal PG synthesis stalls and cell separation is  
465 initiated prior to completion of the septum. Interestingly, these defects were prevented

466 by binding of  $\beta$ -lactam antibiotics to the PBP transpeptidase activity domain, indicating  
467 that this final stage in PG biosynthesis plays a role in coordinating septum synthesis  
468 and activation of autolytic splitting of daughter cells. Consistent with this hypothesis, the  
469 transpeptidase site of PBP1 was proposed to take part in a checkpoint-type mechanism  
470 functioning at the end of each round of cell division to ensure that autolytic splitting of  
471 daughter cells can only take place upon successful completion of septum synthesis  
472 [44,45]. Our work therefore supports the idea that in this clinically important bacterium,  
473 the effect of  $\beta$ -lactam antibiotics is tightly linked to coordination of cell division.

474

## 475 **Materials and Methods**

### 476 **Bacterial strains and growth conditions**

477 Strains used in this study are listed in S2 Table. *S. aureus* strains were grown in tryptic  
478 soy broth media (TSB; Oxoid) under vigorous agitation at 200 rpm at 37°C. In most  
479 experiments, 20 ml of medium was inoculated in 200-ml flasks to allow efficient aeration  
480 of the medium. For solid medium, 1.5% agar was added to make TSA plates.  
481 Erythromycin (7.5 µg ml<sup>-1</sup>) was added as required. Upon receipt of the low-passage  
482 isolate SA564, the strain was cultured once and stored frozen at -80°C. In all  
483 experiments, we used bacterial strains freshly streaked from the frozen stocks on TSA  
484 plates with antibiotics added as required and incubated overnight at 37°C. The growth  
485 was followed by measuring the optical densities at 600 nm. The starting OD was always  
486 below 0.05. When inoculating *S. aureus clpX* deletion strains, care was taken to avoid  
487 visibly larger colonies containing potential suppressor mutants [20]. To reduce the  
488 selection pressure for suppressor mutants in broth cultures, strains were upon  
489 inoculation first grown at 37°C for four generations (OD<sub>600</sub> ~0.1-0.2) before shifting to  
490 30°C. *S. aureus* JE2-derived strains were obtained from the Network of Antimicrobial  
491 Resistance in Staphylococcus aureus (NARSA) program (supported under NIAID/NIH  
492 contract HHSN272200700055C).



493

## 494 **Growth calculations**

495 Growth of *S. aureus* strains was assessed by measuring optical density (OD<sub>600</sub>) of  
496 cultures grown in 96-well microplates (for end-point OD) or in a Bioscreen C instrument  
497 (for growth rates). Overnight cultures were grown in TSB at 37°C. For end-point ODs,  
498 overnight cultures were diluted 1:200 in TSB and grown to exponential phase (OD<sub>600</sub>  
499 0.1) and then diluted 1:10,000 in 200 µl TSB in 96-well format, and incubated 24 h at  
500 30°C with shaking. For growth in the Bioscreen C instrument overnight cultures were  
501 diluted in 300 µl TSB to an OD<sub>600</sub> of approx. 0.001, and OD<sub>600</sub> was measured every 5  
502 min with 20 seconds of shaking before each measurement. All exponential growth rates  
503 were determined by growing the relevant strains in a Bioscreen C instrument as  
504 described above. The growth rates were automatically calculated as described before  
505 [20]. In short, OD<sub>600</sub> values were log-transformed and linear regressions were  
506 determined for each data point in the OD<sub>600</sub> interval from 0.02 to 0.12 based on a  
507 window containing 15 data points. The exponential growth rate was identified as the  
508 maximal slope of the linear regressions. The standard error of the mean was calculated  
509 using values from different biological replicates.

510

## 511 **Disc diffusion assays**

512 *S. aureus* strains were inoculated on TSA plates and incubated at 37°C overnight. The  
513 next day, a bacterial suspension was adjusted to a 0.5 McFarland (Sensititre®  
514 nephelometer and the Sensititre® McFarland Standard) and streaked on MHA. The

515 plates were allowed to dry prior to the addition of 1  $\mu\text{g}$  oxacillin discs (Oxoid) and  
516 incubated at 37°C for 48 hours.

517

### 518 **Time-lapse microscopy**

519 *S. aureus* wild-type (SA564 or 8325-4/pCQ11ftsZ::eYFP) and *clpX* mutant (SA564 $\Delta$ clpX  
520 or 8325-4 $\Delta$ clpX/pCQ11ftsZ::eYFP) were grown overnight in TSB medium at 37°C and  
521 cultures were diluted 100 times in fresh TSB medium and grown until an OD<sub>600</sub> of 0.1.  
522 Cells were washed once in fresh TSB medium and spotted onto a TSB-polyacrylamide  
523 (10%) slide incubated with TSB medium supplemented when appropriate with 0.008  $\mu\text{g}$   
524 ml<sup>-1</sup> oxacillin or with 100  $\mu\text{M}$  IPTG. Acrylamide pads were placed inside a Gene frame  
525 (Thermo Fisher Scientific) and sealed with a cover glass as described before [46].

526 Phase contrast images acquisition was performed using a DV Elite microscope (GE  
527 healthcare) with a sCMOS (PCO) camera with a 100x oil-immersion objective. Images  
528 were acquired with 200 ms exposure time every 2 or 4 minutes for at least 4 h at 30 °C  
529 using Softworx (Applied Precision) software. Images were analyzed using Fiji  
530 (<http://fiji.sc>). Each experiment was performed at least in triplicate. 69 micro colonies  
531 were imaged for SA564; 63 micro colonies for SA564 + oxacillin; 43 micro colonies for  
532 SA564 *clpX* and 36 micro colonies for SA564 *clpX* + oxacillin. Cell tracking was  
533 performed using the TrackMate plugin (<https://imagej.net/TrackMate>) in Fiji, and the  
534 output was converted to Newick format for lineage tree plotting and calculation of cell  
535 generation times using a custom R script (available at [http://github.com/ktbaek/beta-](http://github.com/ktbaek/beta-lactams-clpx)  
536 [lactams-clpx](http://github.com/ktbaek/beta-lactams-clpx)).

537 Time-lapse images of FtsZ-eYFP were acquired using a Leica DMI8 microscope with a  
538 sCMOS DFC9000 (Leica) camera with a 100x oil-immersion objective and a Spectra X  
539 (Lumencor) illumination module. Fluorescent images were acquired every 4 min with  
540 400 ms exposure using a YFP filter cube (Chroma, excitation 492-514 nm, dichroic 520  
541 nm, emission 520-550 nm). Images were processed using LAS X (Leica) and signal  
542 was deconvolved using Huygens (SVI) software.

543

#### 544 **Electron microscopy and image analysis**

545 Overnight cultures grown at 37°C were diluted 1:200 into 40 ml of fresh TSB and grown  
546 at 30°C or 37°C to an OD<sub>600</sub> of 0.5. Bacteria (SA564, 8325-4, and JE2 and the *clpX*  
547 mutant derived here from) from a 10-ml culture aliquot were collected by centrifugation  
548 at 8,000 x g, and the cell pellets were suspended in fixation solution (2.5%  
549 glutaraldehyde in 0.1 M cacodylate buffer [pH 7.4]) and incubated overnight at 4°C. The  
550 fixed cells were further treated with 2% osmium tetroxide, followed by 0.25% uranyl  
551 acetate for contrast enhancement. The pellets were dehydrated in increasing  
552 concentrations of ethanol, followed by pure propylene oxide, and then embedded in  
553 Epon resin. Thin sections for electron microscopy were stained with lead citrate and  
554 observed in a Philips CM100 BioTWIN transmission electron microscope fitted with an  
555 Olympus Veleta camera with a resolution of 2,048 by 2,048 pixels. For quantitative  
556 analysis, the images were acquired in an unbiased fashion by using the multiple image  
557 alignment function in the ITEM software (Olympus). Sample processing and microscopy

558 were performed at the Core Facility for Integrated Microscopy (CFIM), Faculty of Health  
559 and Medical Sciences, University of Copenhagen.

560

### 561 **Scanning electron microscopy (SEM)**

562 Exponentially growing *S. aureus* SA564 were collected by centrifugation, fixed in 2%  
563 glutaraldehyde in 0.05 M sodium phosphate buffer, pH 7.4 and sedimented on  
564 coverslips for 1 week at 4°C. The cells were washed three times with sodium  
565 cacodylate buffer and progressively dehydrated by immersion in a graded series of  
566 ethanol (50–100%). Cells were subsequently mounted on stubs using colloidal silver as  
567 an adhesive, and sputter coated with gold (Leica Coater ACE 200) before imaging with  
568 a FEI Quanta 3D scanning electron microscope operated at an accelerating voltage of 2  
569 kV. Sample preparation and SEM imaging was performed at CFIM.

570

### 571 **SR-SIM analysis**

572 SR-SIM was performed with an Elyra PS.1 microscope (Zeiss) using a Plan-  
573 Apochromat 63x/1.4 oil DIC M27 objective and a Pco.edge 5.5 camera. Images were  
574 acquired with five grid rotation and reconstructed using ZEN software (black edition,  
575 2012, version 8.1.0.484) based on a structured illumination algorithm, using synthetic,  
576 channel specific optical transfer functions and noise filter settings ranging from -6 to -8.  
577 Laser specifications can be seen in S3 Table. SR-SIM was performed at CFIM.

578

579 **Analysis of the cell cycle**

580 To address progression of the cell cycle, exponential cultures of *S. aureus* were  
581 incubated for 5 min at room temperature with the membrane dye Nile Red, the cell wall  
582 dye WGA-488 or Van-FI and the DNA dye Hoechst 3334 (S4 Table). Samples were  
583 placed on an agarose pad and visualized by SR-SIM as described above. 300 cells  
584 were scored according to the stage of septum ingrowth: no septum (phase 1),  
585 incomplete septum (phase 2), or non-separated cells with complete septum (phase 3).  
586 Dead cells were scored based on Hoechst staining: lysed cells, as cells where DNA had  
587 leaked out of the cell and anucleated cells as cells devoid of Hoechst staining. The  
588 analysis was performed on two biological replicates.

589 Additionally, 200 cells were scored according to the state of septum ingrowth (cells with  
590 less than 15% septum ingrowth were scored as “early”, while cells with more than 15%  
591 septum ingrowth were scored as “late”) and whether the ingrowth was asymmetrical or  
592 showed signs of premature splitting. The latter was based on staining with Van-FL. This  
593 analysis was performed on two biological replicates.

594

595 **Analysis of progression of PG synthesis**

596 To evaluate localization of PG synthesis, exponential cultures of *S. aureus* (SA564 or  
597 8325-4) were pulse labeled with FDAAs; cells were initially incubated 10 minutes with  
598 NADA, washed in PBS and resuspended in TSB. The cells were then incubated 10  
599 minutes with HADA, washed with PBS, placed on an agarose pad and visualized by  
600 SR-SIM. This experiment was conducted in three biological replicates including a

601 staining in reverse order and one using the red TADA as a replacement for NADA.  
602 Analysis on the progression of PG synthesis was performed on 300 cells for each  
603 biological replicate with similar results.  
604 To investigate the progression of septal PG synthesis in *clpX* mutant cells displaying  
605 premature split, HADA incorporation was assessed in 50 cells (in each of three  
606 biological replicate) that had initiated septum formation during the initial labeling and  
607 displayed the characteristic morphology of premature splitting were selected randomly.  
608 PG synthesis was followed by assessing.

609

#### 610 **FtsZ localization in SR-SIM**

611 In order to assess FtsZ relative to the active PG synthesis, *S. aureus* (8325-4) wild-type  
612 and *clpX* mutant transformed with pCQ11 expressing an eYFP-tagged derivative of FtsZ  
613 from an IPTG-inducible promoter were analyzed using sequentially labeling with FDAAs  
614 as described above (incubation with TADA for 10 minutes followed by HADA for 10  
615 minutes). Cells were grown at 30°C in the presence of 50  $\mu$ M IPTG (at higher IPTG  
616 concentrations cell division defects were observed in the wild-type strain).

#### 617 **Statistical analysis**

618 Statistical analysis was done using R statistical software. Student's t-test was used to  
619 assess significant differences in growth in the absence or presence of a tested  
620 antibiotic. The Chi-squared test of independence was used to determine if there was a  
621 significant relationship between the proportion of cells assign to each of the three  
622 phases or relevant phenotypes under the tested condition (number of cells in the

623 relevant phase or phenotype/the total number of cells). A value  $P < 0.05$  was  
624 considered significant.

625

## 626 **Acknowledgments**

627 We would like to thank Professor Simon Foster (University of Sheffield) for the generous  
628 gift of FDAA's and the FtsZ-eYFP fusion plasmid. We would like to thank Ewa Kuninska  
629 (University of Copenhagen) for excellent technical assistance and the staff at the Core  
630 Facility for Integrated Microscopy (University of Copenhagen) for their enthusiastic  
631 assistance in doing SEM, TEM and SR-SIM.

632

633 **Figure Legends**

634 **Fig 1. Growth of *S. aureus clpX* mutants is stimulated by  $\beta$ -lactams.**

635 (a) SA564 wild-type and SA564 $\Delta$ *clpX* were plated at 37°C and tested for susceptibility  
636 to oxacillin in a disc diffusion assay. Disks contain 1  $\mu$ g oxacillin. (b) The *S. aureus* wild-  
637 type strains, 8325-4 and SA564 and the corresponding *clpX* deletion mutants were  
638 grown exponentially in TSB at 37°C. At OD<sub>600</sub> = 0.5, the cultures were diluted 10<sup>1</sup>, 10<sup>2</sup>,  
639 10<sup>3</sup> and 10<sup>4</sup>-fold, and 10  $\mu$ l of each dilution was spotted on TSA plates +/- oxacillin and  
640 the plates were subsequently incubated at 30 °C for 24 h. (c) *S. aureus* SA564 wild type  
641 and the *clpX* mutant strains were grown overnight at 37°C, diluted 1:200 and grown at  
642 37°C until mid-exponential phase. These cultures were then diluted into TSB containing  
643 increasing concentrations of the oxacillin in a 96-well format, and the plates were  
644 incubated for 24 h at 30°C. The values represent means of OD values, normalized to  
645 the OD values obtained without compound. Error bars indicate standard deviations.  
646 Note that different scales were used on the two axes due to the difference in growth  
647 between the WT and *clpX* mutant: values for the *clpX* mutant are indicated on the left  
648 vertical axis, and values for the WT are indicated on the right vertical axis to allow easy  
649 comparison of growth between the two strains. (d) Mean growth rates (h<sup>-1</sup>) for *S. aureus*  
650 SA564 wild-type and *clpX* when grown at 30°C as described above. Numbers above  
651 bars indicate mean doubling time in minutes. The standard error of the mean (error  
652 bars) was calculated using values from three biological replicates. Asterisks indicate  
653 significantly improved growth rate (P < 0.05). The P values were obtained by comparing  
654 the growth rates at each concentration to the growth rate without antibiotics and were  
655 calculated using Student's t-test.



656 **Fig 2: Single cell analysis reveals that oxacillin increases the growth rate and**  
657 **prevents spontaneous lysis of the *S. aureus clpX* mutant.**

658 Still images from time-lapse microscopy (phase contrast) of SA564 wild-type and SA564  
659 *clpX* cells growing on a semisolid surface at 30°C, without (a) or supplemented with  
660 oxacillin at 0.008  $\mu\text{g ml}^{-1}$  (b). The still images are taken from movies (see S1 Movie)  
661 showing the typical growth of one micro-colony among at least 36 imaged micro  
662 colonies (see Methods). Scale bar, 2  $\mu\text{m}$ . (c) Number of cells present at each time point  
663 in the shown time-lapse image series.

664

665 **Fig 3. *S. aureus clpX* cells grown at 30°C display aberrant septum ingrowth and**  
666 **initiate daughter cell separation prior to septum closure.**

667 TEM (left panels) and SEM (right panel) images of wild-type (a) or *clpX* mutant cells (b-  
668 f) grown in TSB to mid-exponential phase at 30°C. Images show characteristic  
669 morphologies of wild-type or *clpX* cells at 30°C as determined from at least three  
670 biological replicates using different *S. aureus* strain backgrounds (SA564, 8325-4, and  
671 JE2 and the derived *clpX* mutants). The 1  $\mu\text{m}$  scale-bar applies to TEM images in (a)  
672 and (b). Scale bars, 0.5  $\mu\text{m}$ .

673

674

675 **Fig 4. Oxacillin restores progression of the cell cycle in *S. aureus clpX* cells**  
676 **grown at 30°C.**

677 SA564 wild-type and *clpX* mutant cells were grown at 37°C or 30°C as indicated in the  
678 absence or presence of 0.05  $\mu\text{g ml}^{-1}$  oxacillin (**a and b**); cells were then stained with  
679 membrane dye Nile Red (red) and cell wall dye Van-FL (green) before imaging by SR-  
680 SIM. To examine if ClpX alters progression of the growth cycle, 300 cells (from each of  
681 two biological replicates) were scored according to the stage of septum ingrowth: no  
682 septum (phase 1), incomplete septum (phase 2), or non-separated cells with complete  
683 septum (phase 3), according to the examples images shown in the (**a**) top panel. To  
684 enumerate the number of lysed cells, cells were additionally stained with the DNA dye  
685 Hoechst 3334. Scale bar, 0.5  $\mu\text{m}$ . (**b**) Phase 2 cells (200 phase 2 cells for each  
686 biological replicate) were additionally scored according to the state of septum ingrowth  
687 (cells with less than 15% septum ingrowth were scored as “early” (E), while cells with  
688 more than 15% septum ingrowth were scored as “late” (L)), and whether the ingrowth  
689 was asymmetrical, as shown in the example images in the top panel. The proportion of  
690 cells presenting premature split was estimated based on the Van-FL staining. Scale bar,  
691 0.5  $\mu\text{m}$ .

692

693 **Fig 5. Aberrant progression of septal PG synthesis in *S. aureus* cells lacking ClpX**  
694 **is rescued by oxacillin.**

695 *S. aureus* wild-type (SA564) and *clpX* mutant cells were grown at 30°C and in the  
696 absence (**a and c**) or presence 0.05  $\mu\text{g ml}^{-1}$  oxacillin (**b and c**), and PG synthesis was

697 followed by sequentially labeling with NADA (green in primary data but recolored red to  
698 better distinguish it from the blue HADA signal) for 10 min, followed by washing and  
699 labeling with HADA for additional 10 min before SR-SIM imaging. **(a)** green asterisks  
700 mark cells displaying progression of septum synthesis = non-overlapping septal NADA  
701 and HADA signals; white asterisks mark cells with co-localization of NADA and HADA  
702 signals in an early septum ingrowth; pink asterisks mark cells displaying premature  
703 splitting. Lower panel shows enlarged examples of PG labeling in *clpX* cells displaying  
704 premature splitting and *clpX* cells where NADA and HADA signals overlap in an early  
705 septum ingrowth. **(b)** When *S. aureus* wild-type cells are grown in the presence of sub-  
706 lethal concentrations of oxacillin at 30°C, some cells display overlapping NADA and  
707 HADA septal signals, examples are shown in middle panel. **(c)** To examine progression  
708 of septal PG synthesis in *clpX* cells displaying premature split, 50 cells from each of  
709 three biological replicates (grown +/- oxacillin) that had initiated septum formation during  
710 incubation with NADA, and displayed premature splitting were randomly selected. PG  
711 synthesis was followed by assessing HADA incorporation. **(i-iii)** show examples and  
712 distribution of the three phenotypes observed. **(i)** show the number of cells where  
713 septum synthesis was continued; **(ii)** shows the number of cells where the HADA signal  
714 located to the peripheral wall; **(iii)** shows the number of cells where no HADA signal  
715 was detected. Numbers are given as the mean and SD of the three biological replicates.  
716 Scale bars, 0.5  $\mu\text{m}$ . \*\*\*  $P < 0.001$ ; statistical analysis was performed using the chi  
717 square test for independence.

718

719

720

721 **Fig 6. FtsZ localization and dynamics appear similar in *S. aureus* wild-type and**  
722 ***clpX* mutant cells.**

723 FtsZ localization and dynamics were analyzed in *S. aureus* (8325-4) wild-type and *clpX*  
724 mutant expressing an eYFP-tagged derivative of FtsZ expressed from an IPTG-  
725 inducible promoter. (a) Still images from time-lapse fluorescence microscopy showing  
726 FtsZ dynamics in *S. aureus* wild type and *clpX* cells growing on a semi-solid matrix in  
727 the presence of 100  $\mu$ M IPTG at 30°C (S2 Movie). The fluorescent signal is overlaid  
728 with the phase contrast. Scale bar 1  $\mu$ m. (b) Localization of FtsZ relative to PG synthesis  
729 was analyzed by sequentially FDAA labeling *S. aureus* wild-type and *clpX* cells growing  
730 in TSB with + 50  $\mu$ M IPTG at 30°C: TADA (red) for 10 minutes followed by washing and  
731 labeling with HADA (blue) for additional 10 min prior to SR-SIM imaging. Overview  
732 images can be found in S6 Fig. Examples of cells that started septum synthesis in the  
733 first period of labeling displaying a septal FtsZ-eYFP signal ahead of the site of active  
734 PG synthesis (i) wild-type cell (ii) *clpX* cell (iii) *clpX* cell with co-localization of TADA  
735 and HADA signals; and (iv) *clpX* cell displaying premature split. Scale bars 0.5  $\mu$ m.

736

737 **Fig 7. Growth of *S. aureus clpX* mutants is stimulated by inhibitors of WTA**  
738 **synthesis.**

739 (a and b): *S. aureus* SA564 wild type and *clpX* strains were grown overnight at 37°C,  
740 diluted 1:200 and grown at 37°C until mid-exponential phase. These cultures were then  
741 diluted into TSB containing increasing concentrations of the indicated compounds in a

742 96-well format, and the plates were incubated for 24 h at 30°C. The values represent  
743 means of OD values, normalized to the OD values obtained without compound. Error  
744 bars indicate standard deviations. Note that different scales were used on the two axes  
745 due to the difference in growth between the WT and *clpX* mutant: values for the *clpX*  
746 mutant are indicated on the left vertical axis, and values for the WT are indicated on the  
747 right vertical axis to allow easy comparison of growth between the two strains. **(c and d)**  
748 The *S. aureus* wild-type strains, SA564 (MSSA) and USA300 JE2 (MRSA) and the  
749 corresponding *clpX* mutants were grown exponentially in TSB at 37°C. At OD<sub>600</sub> = 0.5,  
750 cultures were diluted 10<sup>1</sup>, 10<sup>2</sup>, 10<sup>3</sup> and 10<sup>4</sup>-fold, and 10 µl of each dilution was spotted  
751 on TSA plates in the presence or absence of tunicamycin/tarocin A1 (as indicated) and  
752 incubated at 30°C for 24 h.

753

754 **Fig 8. Model of temperature dependent *S. aureus* cell division.**

755 Progression from an early septal ingrowth **(a)** to a late septal ingrowth **(b)** is dependent  
756 on protein-rearrangements in the divisome. At 37°C these rearrangements occur  
757 spontaneously, however at 30°C these rearrangements need assistance from the ClpX  
758 chaperone. **(c)** Upon septum closure, autolytic activity is activated. **(d)** In *S. aureus* cells  
759 lacking ClpX activity, septum synthesis will stall in an early septal ingrowth leading to  
760 activation of autolytic splitting from the peripheral wall and eventually **(e)** cell lysis  
761 unless autolytic activation is inhibited by β-lactams.

762

763 **Supporting information**

764 **S1 Fig.  $\beta$ -lactams stimulate growth of a *S. aureus* *clpX* deletion strains, but not of**  
765 **wild type or *clpP* deletion strains.**

766 Mean growth rates ( $\text{h}^{-1}$ ) for SA564, JE2, and Newman strains and corresponding *clpX*  
767 and *clpP* deletion mutants grown in the presence of increasing concentrations of  $\beta$ -  
768 lactams at 30°C. Numbers indicate mean doubling time in minutes. The standard error  
769 of the mean (error bars) was calculated using values from three biological replicates.  
770 Asterisks indicate significantly improved growth ( $P < 0.05$ ). The P values were obtained  
771 by comparing the growth rates at each antibiotic concentration to the growth rate  
772 without antibiotics and were calculated using Student's t-test

773

774 **S2 Fig. Tracking of single *S. aureus* cells in micro-colonies**

775 **a.** Micro-colony cell lineage trees. Each cell in a representative micro-colony of each  
776 strain and condition was tracked for the first 8h of the time-lapse experiment shown in  
777 Fig 2a, using the TrackMate plugin in Fiji. The diagram shows the resulting cell lineage  
778 trees. Red dots indicate cell lysis. **b.** Single-cell generation time. Each point represents  
779 a newly divided daughter cell with generation time (time until next division) plotted on  
780 the vertical axis, and elapsed time at cell birth plotted on the horizontal axis.

781 **S3 Fig. Morphological changes in *S. aureus clpX* cells grown at 30°C.**

782 TEM images of *S. aureus* SA564 wild type cells (upper panel) and SA564 *clpX* cells  
783 (lower panel) harvested in exponential phase at 30°C. Note the many lysed cells in TEM  
784 images of the *clpX* mutant. Scale bar, 5.0 μm.

785 **S4 Fig. Oxacillin delays separation of daughter cells.**

786 TEM images of SA564 wild-type (panel a and c) or *clpX* cells (panel b and d) cells  
787 grown in TSB to mid-exponential phase at 30°C in the absence (panel a and b) or  
788 presence of 0.05 mg/L oxacillin (panel c and d). The scale bar corresponds to 1.0 μm.  
789 The images show several features of β-lactam treated wild-type and *clpX* cells such as  
790 a weak or missing midline arrow (arrow A), a fuzzy cell wall appearance (arrow B), and  
791 cells failing to separate after division (arrow C). The asymmetrical septum ingrowth can  
792 still be observed in oxacillin treated the *clpX* mutant cells (arrow D).

793

794 **S5 Fig. PG synthesis in *S. aureus clpX* cells grown at 37°C follows the wild-type  
795 paradigm.**

796 SA564*clpX* cells were grown at 37°C in the absence of oxacillin and PG synthesis was  
797 followed by sequentially labeling with TADA (red) for 10 min, followed by washing and  
798 labeling with HADA (blue) for additional 10 min before cells were imaged using SR-SIM.  
799 Scale bar 1.0 μm. The red and blue signals do not overlap, illustrating that septal  
800 peptidoglycan synthesis is progressing predictably inwards and PG synthesis follows

801 the wild-type paradigm for cells in phase 1, 2 and 3. Images shown are representative  
802 of three biological replicates.

803 **S6 Fig. FtsZ localization relative to PG synthesis in wild-type and *clpX* mutant**

804 FtsZ localization was analyzed in *S. aureus* wild-type and *clpX* cells expressing an  
805 eYFP-tagged derivative of FtsZ expressed from an IPTG-inducible promoter.

806 Localization of FtsZ relative to PG synthesis was analyzed by sequentially labeling *S.*  
807 *aureus* wild type and *clpX* cells growing in TSB supplemented with 50  $\mu$ M IPTG at 30°C  
808 with TADA (red) for 10 minutes followed by washing and labeling with HADA (blue) for  
809 additional 10 min prior to SR-SIM imaging. Images shown are representative of cells  
810 from three biological replicates. Scale bars, 1  $\mu$ m (overview), 0.5  $\mu$ m (single cells).

811

812

813 **S7 Fig. Effect of different antibiotics on growth of the wild type and *clpX* cells**

814 *S. aureus* SA564 wild type and *clpX* strains were grown overnight at 37°C, diluted 1:200  
815 and grown at 37°C until mid-exponential phase. These cultures were then diluted into  
816 TSB containing increasing concentrations of the indicated compounds in a 96-well  
817 format, and the plates were incubated for 24 h at 30°C. The values represent means of  
818 OD values, normalized to the OD values obtained without compound. Error bars  
819 indicate standard deviations. Note that different scales were used on the two axes due  
820 to the difference in growth between the WT and *clpX* mutant: values for the *clpX* mutant



821 are indicated on the left vertical axis, and values for the WT are indicated on the right  
822 vertical axis to allow easy comparison of growth between the two strains.

823 **References**

- 824 1. DeLeo FR, Otto M, Kreiswirth BN, Chambers HF. Community-associated meticillin-  
825 resistant *Staphylococcus aureus*. Lancet. 2010;375: 1557–1568.
- 826 2. Elander RP. Industrial production of beta-lactam antibiotics. Appl Microbiol  
827 Biotechnol. 2003;61: 385–392.
- 828 3. Wise EM, Park JT. Penicillin: its basic site of action as an inhibitor of a peptide cross-  
829 linking reaction in cell wall mucopeptide synthesis. Proc Natl Acad Sci USA. 1965;54:  
830 75–81.
- 831 4. Tipper DJ, Strominger JL. Mechanism of action of penicillins: a proposal based on  
832 their structural similarity to acyl-D-alanyl-D-alanine. Proc Natl Acad Sci USA. 1965;54:  
833 1133–1141.
- 834 5. Tomasz A. The mechanism of the irreversible antimicrobial effects of penicillins: how  
835 the beta-lactam antibiotics kill and lyse bacteria. Annu Rev Microbiol. 1979;33: 113–  
836 137.
- 837 6. McDowell TD, Reed KE. Mechanism of penicillin killing in the absence of bacterial  
838 lysis. Antimicrob Agents Chemother. 1989;33: 1680–1685.
- 839 7. Giesbrecht P, Kersten T, Maidhof H, Wecke J. Staphylococcal cell wall:  
840 morphogenesis and fatal variations in the presence of penicillin. Microbiol Mol Biol Rev.  
841 1998;62: 1371–1414.
- 842 8. Bayles KW. The bactericidal action of penicillin: new clues to an unsolved mystery.  
843 Trends Microbiol. 2000;8: 274–278.

- 844 9. Cho H, Uehara T, Bernhardt TG. Beta-lactam antibiotics induce a lethal  
845 malfunctioning of the bacterial cell wall synthesis machinery. *Cell*. 2014;159: 1300–  
846 1311.
- 847 10. Pinho MG, Kjos M, Veening J-W. How to get (a)round: mechanisms controlling  
848 growth and division of coccoid bacteria. *Nat Rev Microbiol*. 2013;11: 601–614.
- 849 11. Reed P, Atilano ML, Alves R, Hoiczky E, Sher X, Reichmann NT, *et al*.  
850 *Staphylococcus aureus* survives with a minimal peptidoglycan synthesis machine but  
851 sacrifices virulence and antibiotic resistance. *PLoS Pathog*. 2015;11: e1004891.
- 852 12. Peacock SJ, Paterson GK. Mechanisms of methicillin resistance in *Staphylococcus*  
853 *aureus*. *Annu Rev Biochem*. 2015;84: 577-601.
- 854 13. Rolo J, Worning P, Nielsen JB, Sobral R, Bowden R, Bouchami O, *et al*. Evidence  
855 for the evolutionary steps leading to *mecA*-mediated  $\beta$ -lactam resistance in  
856 staphylococci. *PLoS Genetics*. 2017;13: e1006674.
- 857 14. Campbell J, Singh AK, Santa Maria JP Jr, Kim Y, Brown S, Swoboda JG, *et al*.  
858 Synthetic lethal compound combinations reveal a fundamental connection between wall  
859 teichoic acid and peptidoglycan biosyntheses in *Staphylococcus aureus*. *ACS Chem*  
860 *Biol*. 2011;6: 106–116.
- 861 15. Farha MA, Leung A, Sewell EW, D'Elia MA, Allison SE, Ejim L, *et al*. Inhibition of  
862 WTA synthesis blocks the cooperative action of PBPs and sensitizes MRSA to  $\beta$ -  
863 lactams. *ACS Chem Biol*. 2012;8: 226–233.

- 864 16. Lee SH, Wang H, Labroli M, Koseoglu S, Zuck P, Mayhood T, *et al.* TarO-specific  
865 inhibitors of wall teichoic acid biosynthesis restore  $\beta$ -lactam efficacy against methicillin-  
866 resistant staphylococci. *Sci Transl Med.* 2016;8: 329ra32.
- 867 17. Drawz SM, Bonomo RA, Three decades of  $\beta$ -lactamase inhibitors. *Clin Microbiol*  
868 *Rev.* 2010;23: 60–201.
- 869 18. Olivares AO, Baker TA, Sauer RT. Mechanistic insights into bacterial AAA+  
870 proteases and protein-remodelling machines. *Nat Rev Microbiol.* 2016;14: 33–44.
- 871 19. Frees D, Qazi S, Hill PJ, Ingmer H. Alternative roles of ClpX and ClpP in  
872 *Staphylococcus aureus* stress tolerance and virulence. *Mol Microbiol.* 2003;48:1565–  
873 1578.
- 874 20. Bæk K, Bowman L, Søgaaard M, Kaeffer V, Siljamäki P, Savijoki K, *et al.* The cell  
875 wall polymer lipoteichoic acid becomes non-essential in *Staphylococcus aureus* cells  
876 lacking the ClpX chaperone. *MBio.* 2016;7: e01228-16.
- 877 21. Stahlhut SG, Alqarzaee AA, Jensen C, Fisker NS, Pereira AR, Pinho MG, *et al.* The  
878 ClpXP protease is dispensable for degradation of unfolded proteins in *Staphylococcus*  
879 *aureus*. *Sci Rep.* 2017;7: 11739.
- 880 22. Percy MG, Gründling A. Lipoteichoic acid synthesis and function in gram-positive  
881 bacteria. *Annu Rev Microbiol.* 2014;68: 81-100.
- 882 23. Bæk KT, Gründling A, Mogensen RG, Thøgersen L, Petersen A, Paulander W, *et al.*  
883  $\beta$ -Lactam resistance in methicillin-resistant *Staphylococcus aureus* USA300 is

- 884 increased by inactivation of the ClpXP protease. *Antimicrob Agents Chemother.*  
885 2014;58: 4593–4603.
- 886 24. Monteiro JM, Fernandes PB, Vaz F, Pereira AR, Tavares AC, Ferreira MT, *et al.*  
887 Cell shape dynamics during the staphylococcal cell cycle. *Nat Commun.* 2015;6: 8055.
- 888 25. Zhou X, Halladin DK, Rojas ER, Koslover EF, Lee TK, Huang KC *et al.* Bacterial  
889 division. Mechanical crack propagation drives millisecond daughter cell separation in  
890 *Staphylococcus aureus*. *Science.* 2015;348: 574-8.
- 891 26. Kahl BC, Belling G, Reichelt R, Herrmann M, Proctor RA, Peters G. Thymidine-  
892 dependent small-colony variants of *Staphylococcus aureus* exhibit gross morphological  
893 and ultrastructural changes consistent with impaired cell separation. *J Clin Microbiol.*  
894 2003;41:410-3.
- 895 27. Paul TR, Venter A, Blaszczyk LC, Parr TR, Labischinski H, Beveridge TJ.  
896 Localization of penicillin-binding proteins to the splitting system of *Staphylococcus*  
897 *aureus* septa by using a mercury-penicillin V derivative. *J Bacteriol.* 1995;177: 3631–  
898 3640.
- 899 28. Lorian V. Some effect of subinhibitory concentrations of penicillin on the structure  
900 and division of staphylococci. *Antimicrob Agents Chemother.* 1975;7: 864–867.
- 901 29. Kuru E, Hughes HV, Brown PJ, Hall E, Tekkam S, Cava F, *et al.* In situ probing of  
902 newly synthesized peptidoglycan in live bacteria with fluorescent D-amino acids. *Angew*  
903 *Chem Int Ed.* 2012;51: 12519–12523.

- 904 30. Lund VA, Wacnik K, Turner RD, Cotterell BE, Walther CG, Fenn SJ, *et al.* Molecular  
905 coordination of *Staphylococcus aureus* cell division. *Elife*. 2018;7: e32057.
- 906 31. Weart RB, Nakano S, Lane BE, Zuber P, Levin PA. The ClpX chaperone modulates  
907 assembly of the tubulin-like protein FtsZ. *Mol Microbiol*. 2005;57: 238–249.
- 908 32. Dziedzic R, Kiran M, Plocinski P, Ziolkiewicz M, Brzostek A, Moomey M, *et al.*  
909 *Mycobacterium tuberculosis* ClpX Interacts with FtsZ and Interferes with FtsZ Assembly.  
910 *PLoS ONE*. 2010;5: e11058.
- 911 33. Sugimoto S, Yamanaka K, Nishikori S, Miyagi A, Ando T, Ogura T. AAA+ chaperone  
912 ClpX regulates dynamics of prokaryotic cytoskeletal protein FtsZ. *J Biol Chem*.  
913 2010;285: 6648–6657.
- 914 34. Haeusser DP, Lee AH, Weart RB, Levin PA. ClpX inhibits FtsZ assembly in a  
915 manner that does not require its ATP hydrolysis-dependent chaperone activity. *J*  
916 *Bacteriol*. 2009;191: 1986–1991.
- 917 35. Liew AT, Theis T, Jensen SO, Garcia-Lara J, Foster SJ, Firth N, *et al.* A simple  
918 plasmid-based system that allows rapid generation of tightly controlled gene expression  
919 in *Staphylococcus aureus*. *Microbiology*. 2011;157: 666-76.
- 920 36. Monteiro JM, Pereira AR, Reichmann NT, Saraiva BM, Fernandes PB, Veiga H, *et*  
921 *al.* Peptidoglycan synthesis drives an FtsZ-treadmilling-independent step of cytokinesis.  
922 *Nature*. 2018;554:528-532.
- 923 37. Haeusser DP, Margolin W. Splitsville: structural and functional insights into the  
924 dynamic bacterial Z ring. *Nat Rev Microbiol*. 2016;14: 305-19.

- 925 38. Matias VR, Beveridge TJ. Native cell wall organization shown by cryo-electron  
926 microscopy confirms the existence of a periplasmic space in *Staphylococcus aureus*. J  
927 Bacteriol. 2006;188: 1011–1021.
- 928 39. Yamada S, Sugai M, Komatsuzawa H, Nakashima S, Oshida T, Matsumoto A, *et al.*  
929 An autolysin ring associated with cell separation of *Staphylococcus aureus*. J Bacteriol.  
930 1996 ;178 : 1565–1571.
- 931 40. Kajimura J, Fujiwara T, Yamada S, Suzawa Y, Nishida T, Oyamada Y, *et al.*  
932 Identification and molecular characterization of an N-acetylmuramyl-l-alanine amidase  
933 Sle1 involved in cell separation of *Staphylococcus aureus*. Mol Microbiol. 2005;58:  
934 1087–1101.
- 935 41. Feng J, Michalik S, Varming AN, Andersen JH, Albrecht D, Jelsbak L, *et al.*  
936 Trapping and proteomic identification of cellular substrates of the ClpP protease in  
937 *Staphylococcus aureus*. J Proteome Res. 2013;12: 547-58.
- 938 42. Chung HS, Yao Z, Goehring NW, Kishony R, Beckwith J, Kahne D. Rapid beta-  
939 lactam-induced lysis requires successful assembly of the cell division machinery. Proc  
940 Natl Acad Sci USA. 2009;106: 21872–21877.
- 941 43. Schlag M, Biswas R, Krismer B, Kohler T, Zoll S, Yu W, *et al.* Role of staphylococcal  
942 wall teichoic acid in targeting the major autolysin Atl. Mol Microbiol. 2010;75: 864-73.
- 943 44. Pereira SFF, Henriques AO, Pinho MG, Tomasz A. Role of PBP1 in cell division of  
944 *Staphylococcus aureus*. J Bacteriol. 2007;189: 3525–3531.

945 45. Pereira SFF, Henriques AO, Pinho MG, Lencastre H de, Tomasz A. Evidence for a  
946 dual role of PBP1 in the cell division and cell separation of *Staphylococcus aureus*. Mol  
947 Microbiol. 2009;72: 895–904.

948 46. de Jong IG, Beilharz K, Kuipers OP, Veening JW. J. Live Cell Imaging of *Bacillus*  
949 *subtilis* and *Streptococcus pneumoniae* using Automated Time-lapse Microscopy. Vis  
950 Exp. 2011;53.

951

952

953

954

955



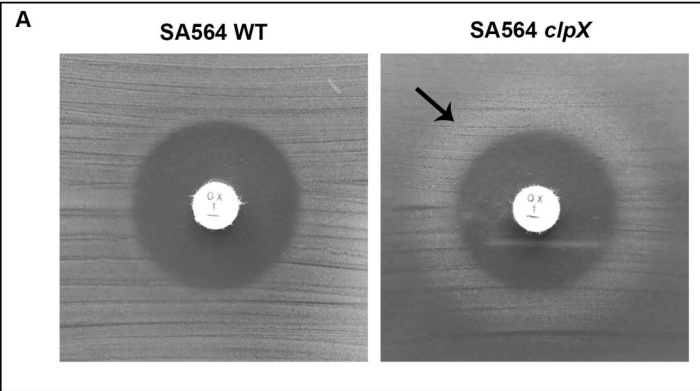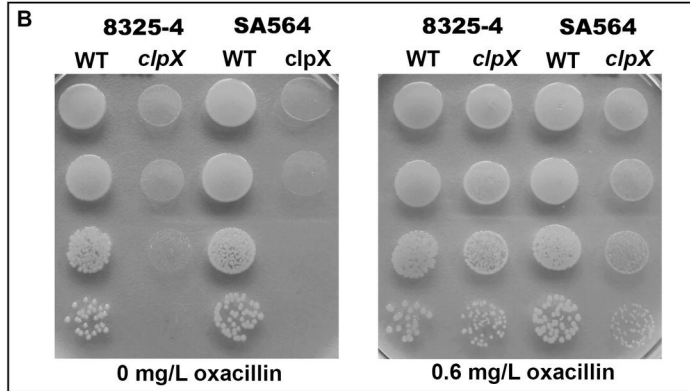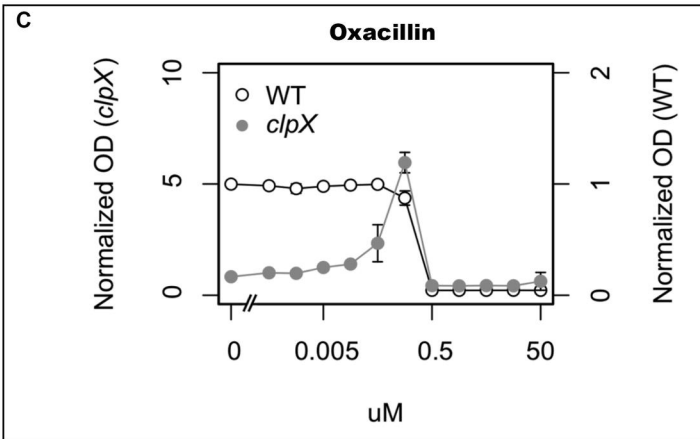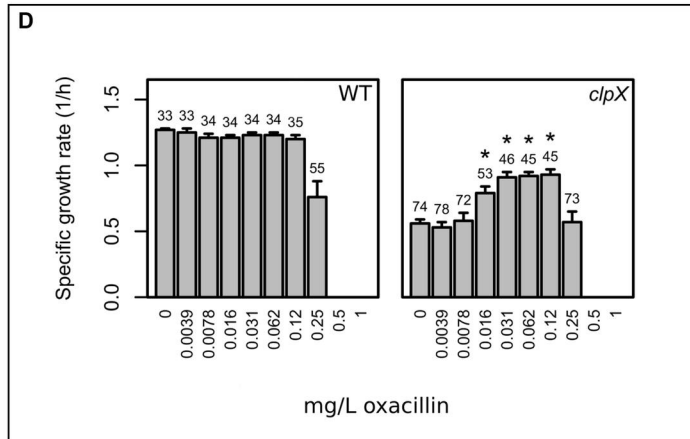

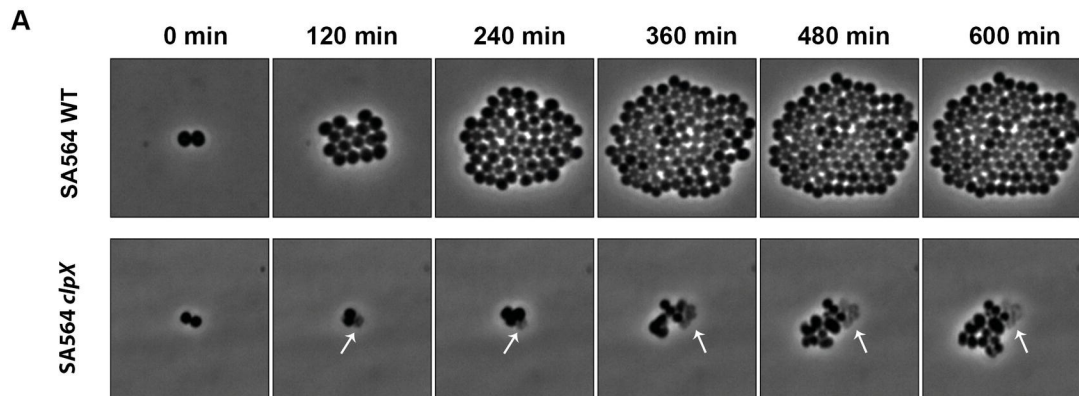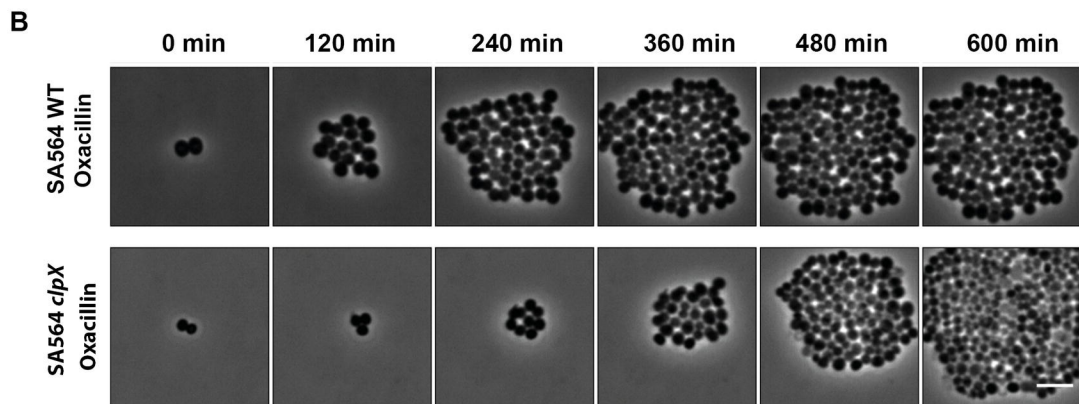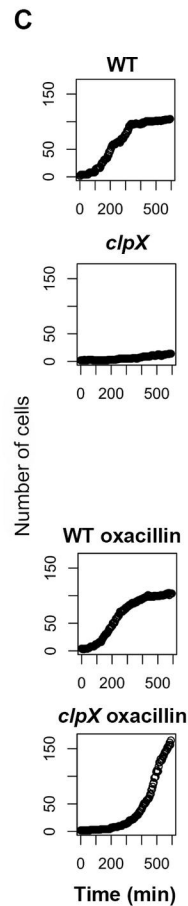

WT

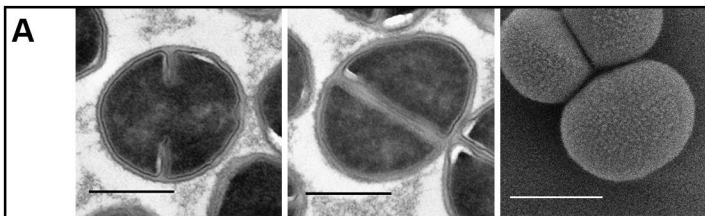

**B**

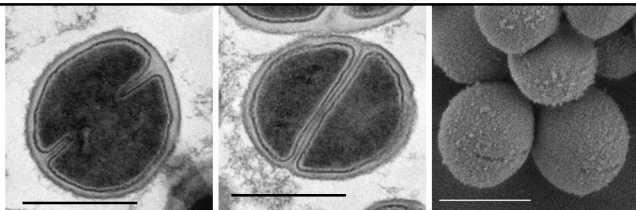

**C**

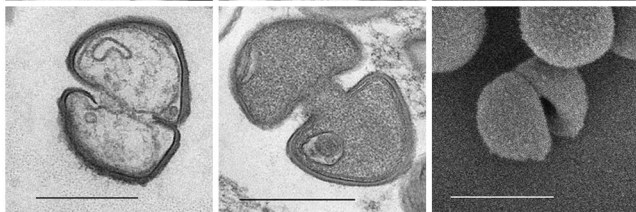

**D**

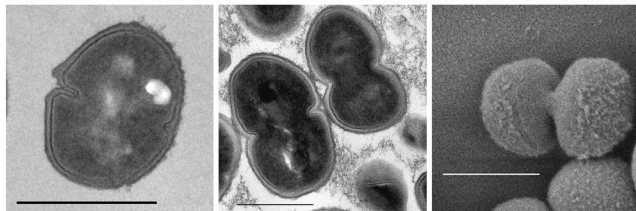

*clpX*

**E**

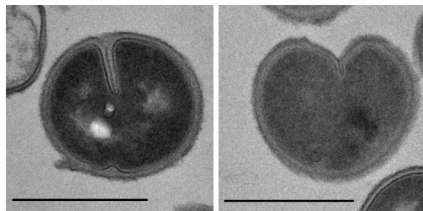

**F**

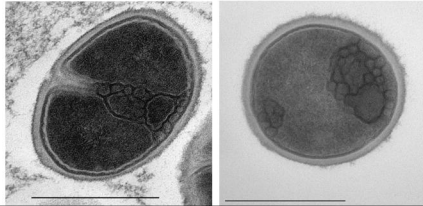

**A**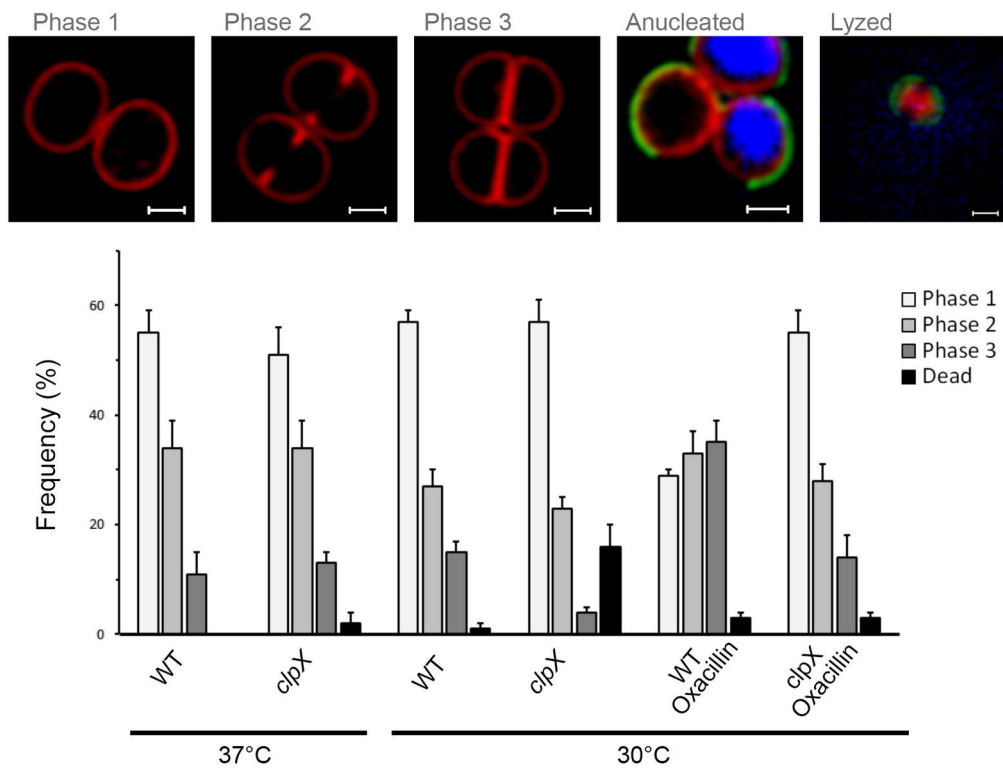**B**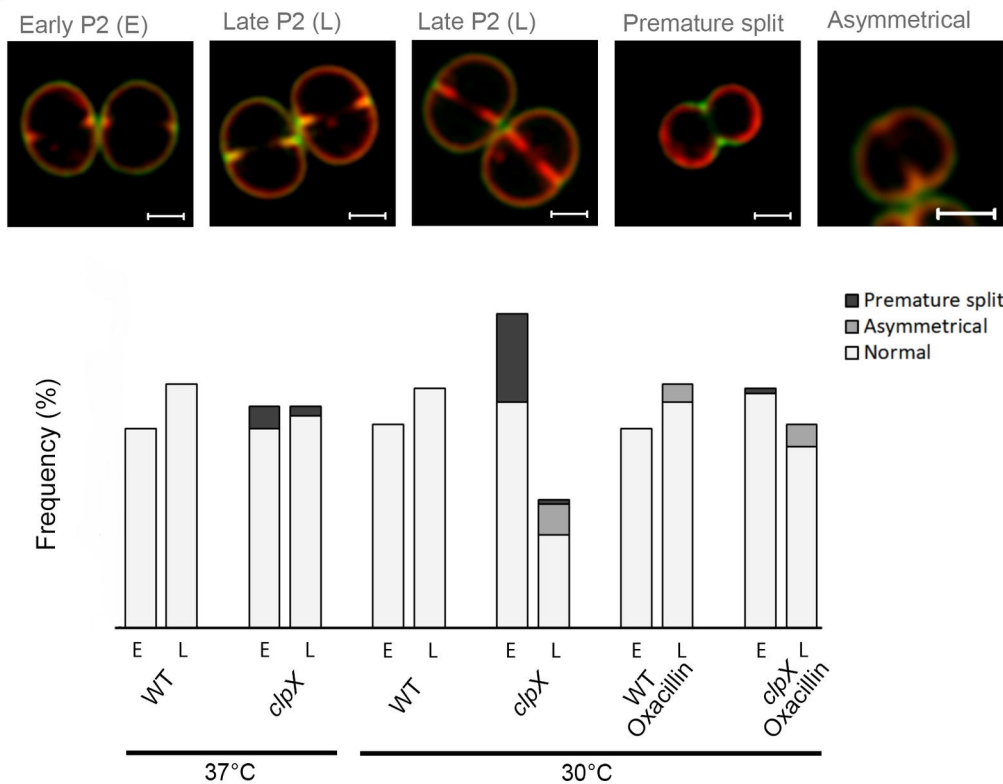

**A PG progression at 30°C**

NADA (10')      HADA (10')      Overlay

Wild-type

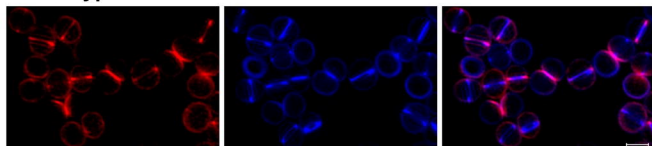

*clpX*

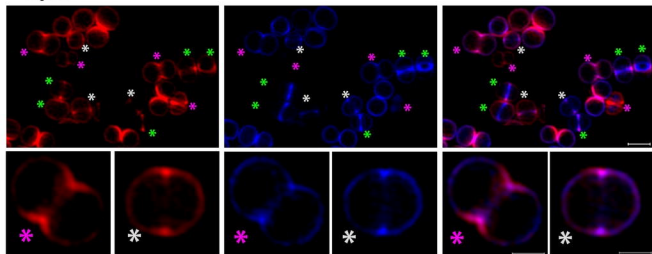**B PG progression in presence of oxacillin**

NADA (10')      HADA (10')      Overlay

Wild-type

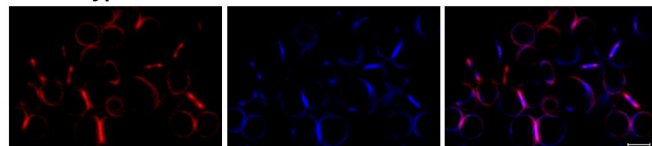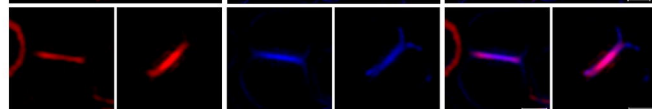

*clpX*

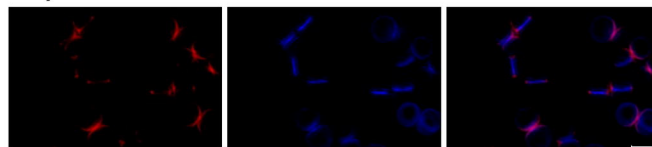**C PG progression in *clpX* cells with premature split**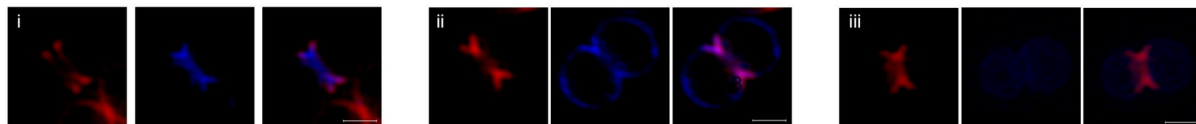

- oxacillin  
+ oxacillin

$6 \pm 1$   
 $40 \pm 5$

$36 \pm 2$   
 $8 \pm 2$

$8 \pm 1$   
 $2 \pm 2$

**A**

0 min

8 min

16 min

24 min

32 min

8325-4 WT

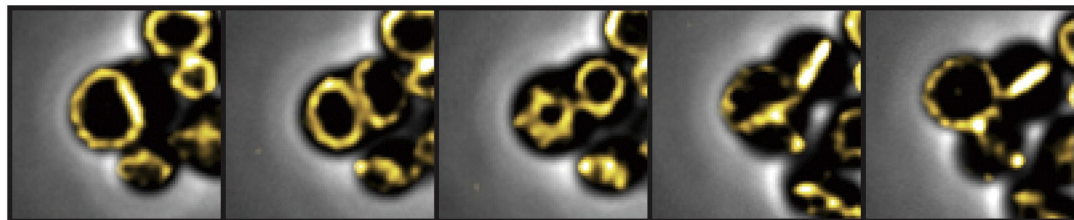8325-4 *clpX*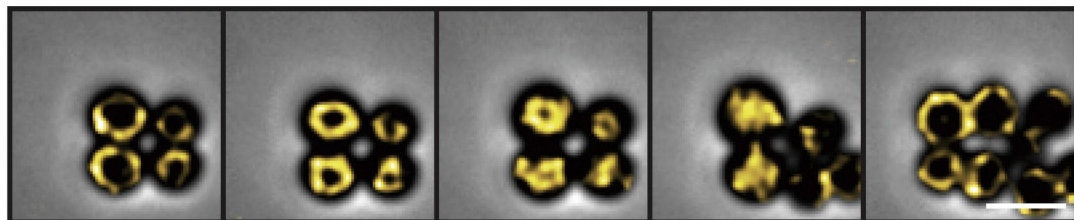**B**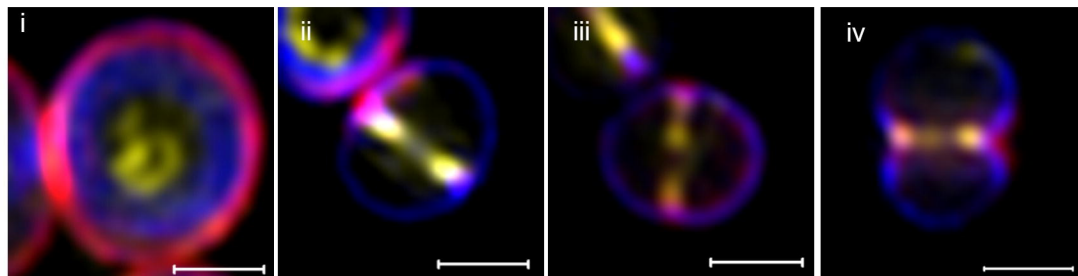

WT

*clpX**clpX*  
Stalled*clpX*  
Premature split

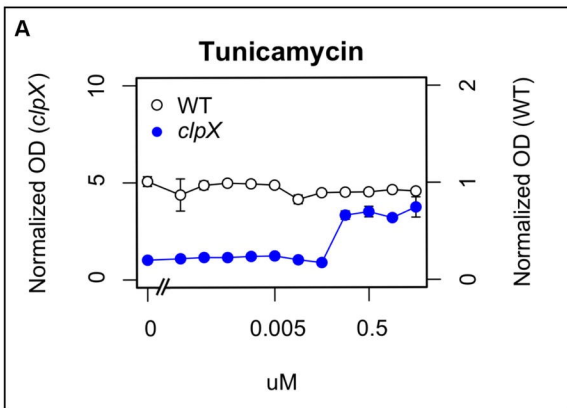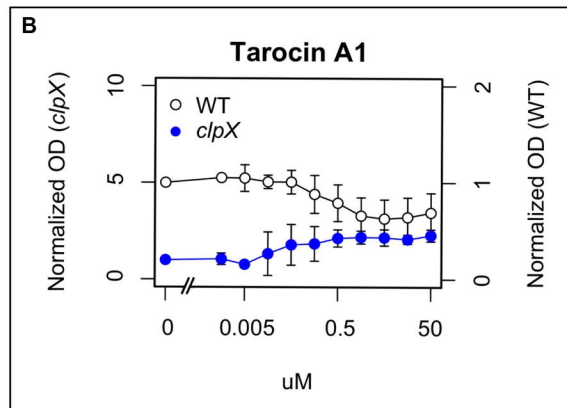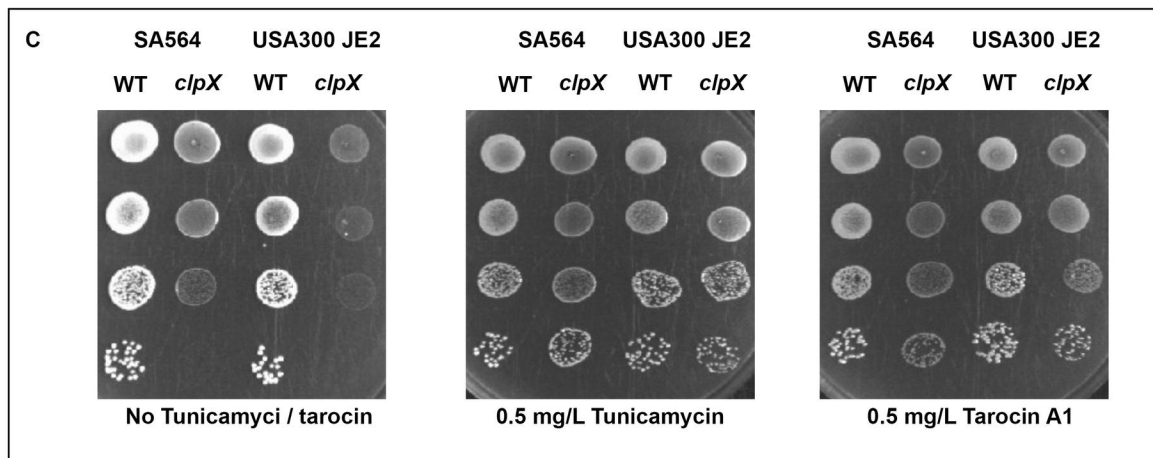

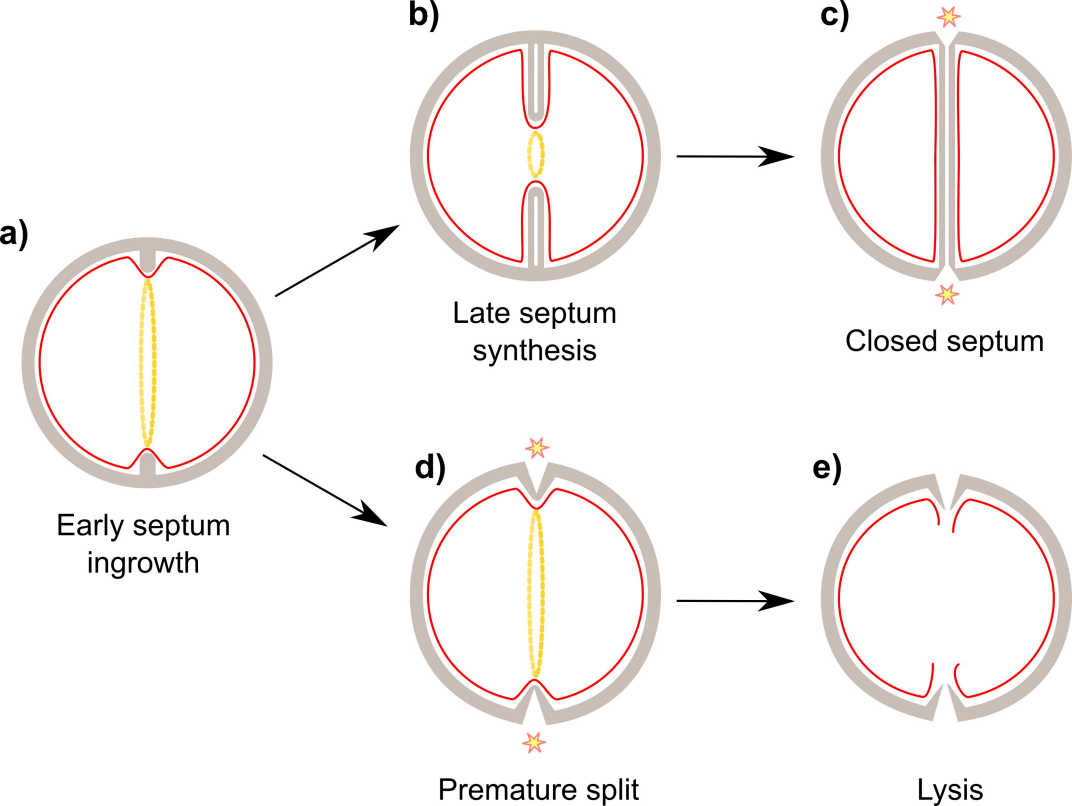

Source: http://biorxiv.org/content/10.1101/313668v1.full.pdf
